# Supplementary material for: Bacillus Cyclic Lipopeptides Iturin and Fengycin Control Rice Blast Caused by Pyricularia oryzae in Potting and Acid Sulfate Soils by Direct Antagonism and Induced Systemic Resistance
Source: MDPI journal article supplement (doi:10.3390/microorganisms9071441), 2021-07-03
Supplement: s1 [file s1]

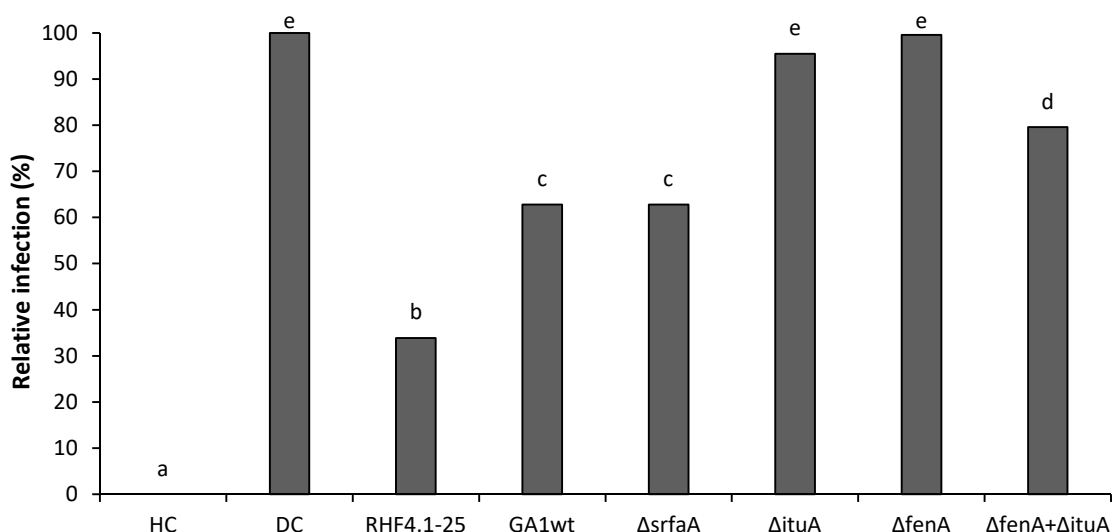

**Figure S1.** Potential of *B. velezensis* isolates RHF4.1-25 and GA1 and GA1 mutants impaired in CLiP production to induce systemic resistance against *P. oryzae* in rice (variety CO39) grown in sterile potting soil. Data from Figure 4 are here expressed as % relative infection in comparison with the diseased control (n=27). Univariate ANOVA followed by Duncan's post hoc tests were used and different letters among these treatments indicate statistically significant differences ( $P < 0.05$ ). HC: healthy control; DC: diseased control; RHF4.1-25 and GA1: wild type *B. velezensis*;  $\Delta srfaA$ : surfactin mutant of GA1;  $\Delta ituA$ : iturin mutant of GA1;  $\Delta fenA$ : fengycin mutant of GA1;  $\Delta fenA + \Delta ituA$ : combined inoculation with fengycin and iturin mutant of GA1.

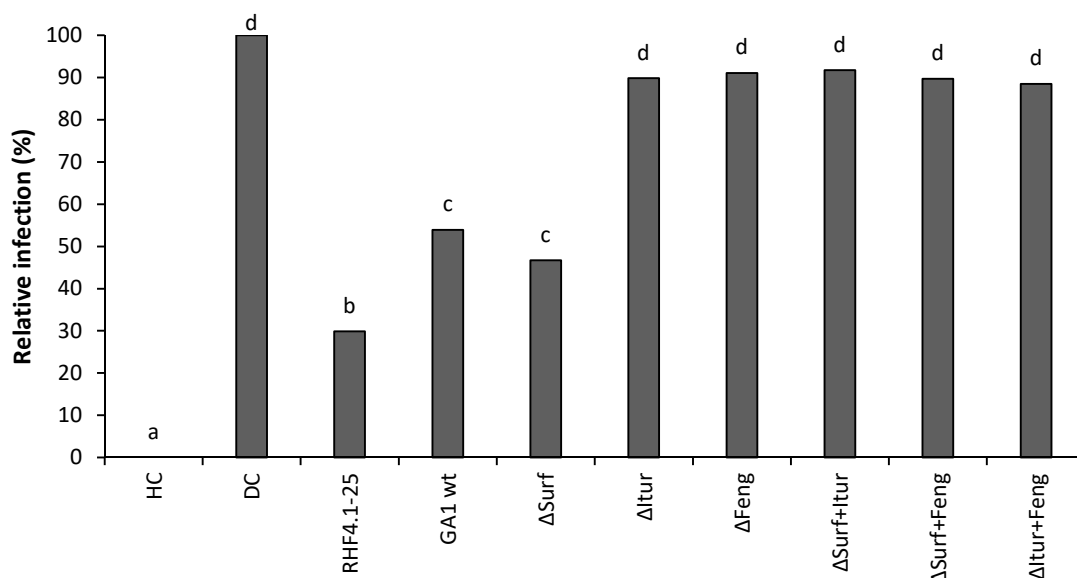

**Figure S2.** Potential of *B. velezensis* isolates RHF4.1-25 and GA1, and GA1 mutants impaired in CLiP production to induce systemic resistance against *P. oryzae* in rice (variety CO39) grown in sterile **potting soil**. Data from Figure 5 are here expressed as % relative infection in comparison with the diseased control (n=27). Univariate ANOVA followed by Duncan's post hoc tests were used and different letters among these treatments indicate statistically significant differences ( $P < 0.05$ ). HC: healthy control; DC: diseased control; RHF4.1-25 and GA1: wild type *B. velezensis*;  $\Delta srfaA$ : surfactin mutant;  $\Delta ituA$ : iturin mutant;  $\Delta fenA$ : fengycin mutant.  $\Delta srfaA$ - $\Delta ituA$ : double mutant impaired in surfactin and iturin production;  $\Delta srfaA$ - $\Delta ituA$ : double mutant impaired in surfactin and fengycin production;  $\Delta fenA$ - $\Delta ituA$ : double mutant impaired in iturin and fengycin production.

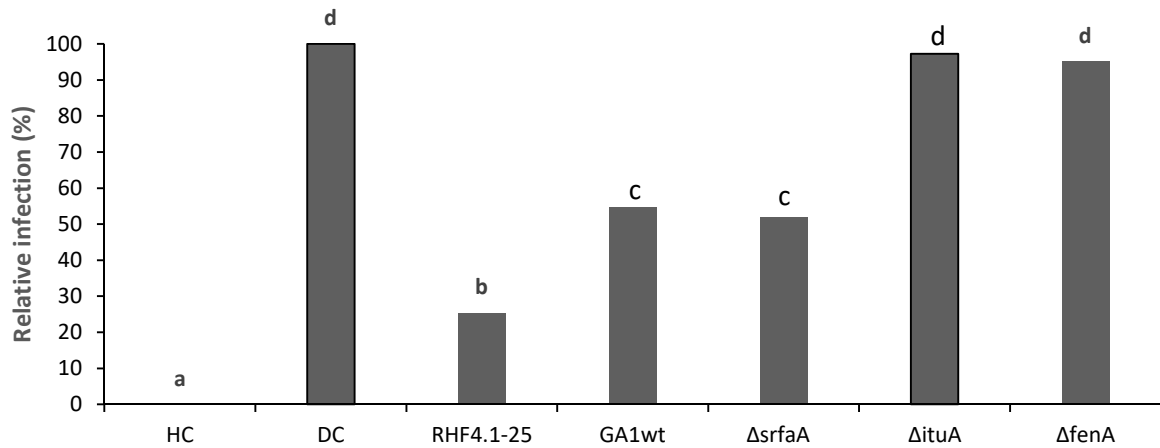

**Figure S3.** Potential of *B. velezensis* isolates RHF4.1-25 and GA1, and GA1 mutants impaired in CLiP production to induce systemic resistance against *P. oryzae* in rice (variety Jasmine 85) grown in sterile acid sulfate soil. Data from Figure 5 are here expressed as % relative infection in comparison with the diseased control (n=15). Univariate ANOVA followed by Duncan's post hoc tests were used and different letters among these treatments indicate statistically significant differences ( $P < 0.05$ ). HC: healthy control; DC: diseased control; RHF4.1-25 and GA1: wild type *B. velezensis*;  $\Delta srfA$ : surfactin mutant of GA1;  $\Delta ituA$ : iturin mutant of GA1;  $\Delta fenA$ : fengycins mutant of GA1.

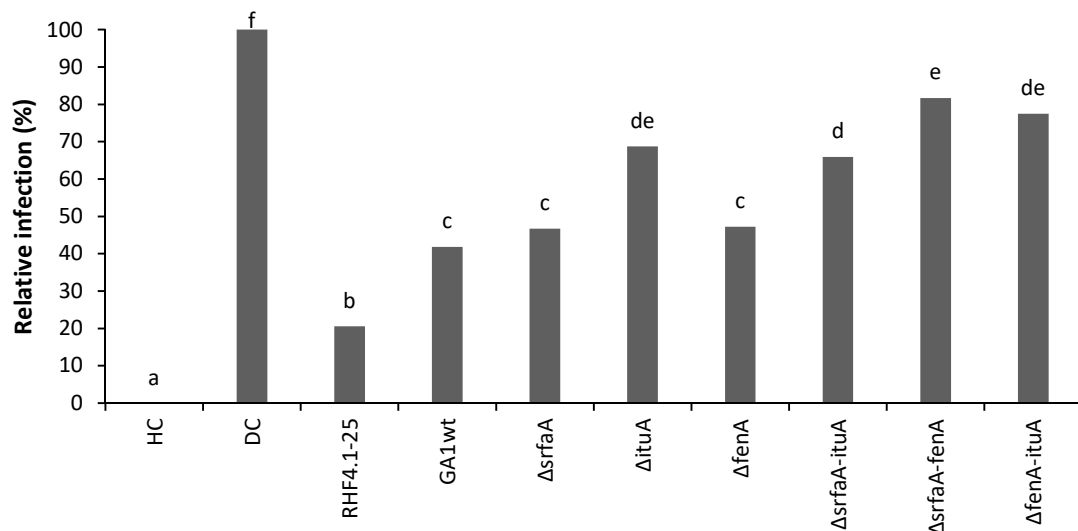

**Figure S4.** Direct antagonistic activity of cell-free supernatants obtained from CLiPs-producing *B. velezensis* RHF4.1-25, *B. velezensis* GA1 wild type and its mutants against *P. oryzae* VT5M1. Data from Figure 9 are here expressed as % relative infection in comparison with the diseased control (n=21). One-way ANOVA followed by Duncan's post hoc tests were used and different letters among these treatments indicate statistically significant differences ( $P < 0.05$ ). HC: healthy control; DC: diseased control; RHF4.1-25 and GA1: wild type *B. velezensis*;  $\Delta srfA$ : surfactin mutant;  $\Delta ituA$ : iturin mutant;  $\Delta fenA$ : fengycins mutant.  $\Delta srfA-ituA$ : double mutant impaired in surfactin and iturin production;  $\Delta srfA-fenA$ : double mutant impaired in surfactin and fengycins production;  $\Delta fenA-ituA$ : double mutant impaired in iturin and fengycins production.
